# Supplementary material for: Characteristics of Antibiotic Resistance and Tolerance of Environmentally Endemic Pseudomonas aeruginosa
Source: MDPI journal article supplement (doi:10.3390/antibiotics11081120), 2022-08-18
Supplement: s1 [file s1]

## **Supplementary data**

**Title:** Characteristics of Antibiotic Resistance and Tolerance of Environmentally Endemic *Pseudomonas aeruginosa*

## **Authors**

Seryoung Kim <sup>1</sup>, Satomi Masai <sup>1</sup>, Keiji Murakami <sup>2</sup>, Momoyo Azuma <sup>3</sup>, Keiko Kataoka <sup>4</sup>, Mayu Sebe <sup>2</sup>, Kazuya Shimizu <sup>5</sup>, Tomoaki Itayama <sup>6</sup>, Niwooti Whangchai <sup>7</sup>, Kanda Whangchai <sup>8</sup>, Ikko Ihara <sup>9</sup>, Hideaki Maseda <sup>1, 10, 11\*</sup>

## **Affiliations**

<sup>1</sup> Biomedical Research Institute, National Institute of Advanced Industrial Science and Technology, 1-8-31 Midorigaoka, Osaka 563-8577, Japan

<sup>2</sup> Department of Clinical Nutrition Faculty of Health Science and Technology, Kawasaki University of Medical Welfare, 288 Matsushima, Okayama 701-0193, Japan

<sup>3</sup> Department of Infection Control and Prevention, Tokushima University Hospital, 2-50-1 Kuramoto, Tokushima 770-8503, Japan

<sup>4</sup> Department of Microbiology and Genetic Analysis, Institute of Biomedical Science, Tokushima University Graduate School, Tokushima 770-8503, Japan

<sup>5</sup> Faculty of Life Sciences, Toyo University, 1-1-1 Izumino, Itakura-machi, Ora-gun, Gunma 374-0193, Japan

<sup>6</sup> Graduate School of Engineering, Nagasaki University, 1-14 Bunkyo, Nagasaki 852-8131, Japan

<sup>7</sup> Faculty of Fisheries Technology and Aquatic Resources, Maejo University, Chiang Mai 50290, Thailand

<sup>8</sup> Center of Excellence in Bioresources for Agriculture, Industry and Medicine, Chiang Mai University, Chiang Mai 50200, Thailand

<sup>9</sup> Department of Agricultural Engineering and Socio-Economics, Kobe University, Kobe 657-8501, Japan

<sup>10</sup> Graduate School of Life and Environmental Sciences, University of Tsukuba, 1-1-1 Tennodai, Ibaraki 305-8577, Japan

<sup>11</sup> Department of Environmental Engineering and Green Technology, Malaysia-Japan International Institute of Technology, Universiti Teknologi Malaysia, Kuala Lumpur 54100, Malaysia

\*Correspondence to: Hideaki Maseda

Tel: +81-72-751-9810, Fax: +81-72-751-9628, E-mail: maseda.h@aist.go.jp

**Table S1.** The source of *P. aeruginosa* strains isolated from clinical settings

| Isolation source   | Strains                                                                                                                | Number of strains |
|--------------------|------------------------------------------------------------------------------------------------------------------------|-------------------|
| Blood              | CL07, CL21, CL30, CL36, CL39                                                                                           | 5                 |
| Catheter           | CL02, CL06                                                                                                             | 2                 |
| Nasal mucosa       | CL17                                                                                                                   | 1                 |
| Oral mucosa        | CL13                                                                                                                   | 1                 |
| Pharynx secretions | CL03, CL04, CL24, CL25                                                                                                 | 4                 |
| Pus                | CL27                                                                                                                   | 1                 |
| Skin               | CL09                                                                                                                   | 1                 |
| Sputum             | CL01, CL08, CL10, CL11, CL12, CL14,<br>CL15, CL18, CL20, CL22, CL23, CL26,<br>CL28, CL29, CL32, CL35, CL38, CL41, CL42 | 19                |
| Urine              | CL05, CL16, CL19, CL31, CL33, CL34,<br>CL37, CL40                                                                      | 8                 |
| Total              |                                                                                                                        | 42                |

**Table S2.** The results of antibiotic susceptibility of the strains isolated from the environment.

| Strain | MIC ( $\mu\text{g/mL}$ ) |        |     |     |     |     |     |     |
|--------|--------------------------|--------|-----|-----|-----|-----|-----|-----|
|        | CHL                      | CIP    | TET | IPM | ATM | AMK | RIF | MIN |
| EN-001 | 128                      | 0.125  | 32  | 2   | 4   | 2   | 32  | 64  |
| EN-002 | 1024                     | 1      | 128 | 2   | >32 | 2   | 32  | 256 |
| EN-003 | 128                      | 0.125  | 16  | 2   | 4   | 2   | 16  | 32  |
| EN-004 | 256                      | 0.25   | 64  | 2   | 8   | 4   | 32  | 64  |
| EN-005 | 256                      | 0.25   | 32  | 2   | 4   | 4   | 32  | 32  |
| EN-006 | 256                      | 0.25   | 32  | 1   | 4   | 4   | 32  | 32  |
| EN-007 | 256                      | 0.125  | 32  | 2   | 4   | 2   | 32  | 64  |
| EN-008 | 256                      | 0.25   | 32  | 2   | 8   | 4   | 32  | 64  |
| EN-009 | 256                      | 0.25   | 32  | 1   | 8   | 4   | 32  | 64  |
| EN-010 | 256                      | 0.25   | 32  | 2   | 4   | 4   | 16  | 32  |
| EN-011 | 128                      | 2      | 32  | 2   | 8   | 2   | 16  | 32  |
| EN-012 | 256                      | 0.125  | 32  | 1   | 4   | 2   | 32  | 32  |
| EN-013 | 256                      | 0.0625 | 32  | 1   | 4   | 2   | 32  | 32  |
| EN-014 | 512                      | 0.25   | 64  | 1   | 8   | 8   | 32  | 64  |
| EN-015 | 256                      | 0.125  | 32  | 1   | 4   | 2   | 16  | 32  |
| EN-016 | 128                      | 0.125  | 32  | 0.5 | 4   | 4   | 32  | 32  |
| EN-017 | 128                      | 0.25   | 32  | 2   | 2   | 2   | 16  | 32  |
| EN-018 | 128                      | 0.25   | 32  | 2   | 4   | 2   | 16  | 32  |
| EN-019 | 128                      | 0.25   | 32  | 2   | 4   | 4   | 32  | 32  |
| EN-020 | 128                      | 0.25   | 32  | 2   | 4   | 4   | 32  | 32  |
| EN-021 | 128                      | 0.25   | 32  | 2   | 4   | 2   | 16  | 32  |
| EN-022 | 64                       | 0.25   | 32  | 1   | 4   | 2   | 32  | 32  |
| EN-023 | 128                      | 0.125  | 16  | 1   | 4   | 2   | 16  | 32  |
| EN-024 | 128                      | 0.125  | 32  | 0.5 | 4   | 4   | 16  | 32  |
| EN-025 | 128                      | 0.125  | 16  | 1   | 4   | 2   | 16  | 32  |
| EN-026 | 128                      | 0.25   | 32  | 2   | 4   | 2   | 32  | 32  |
| EN-027 | 128                      | 0.25   | 32  | 2   | 8   | 4   | 32  | 32  |
| EN-028 | 128                      | 0.125  | 32  | 1   | 4   | 1   | 16  | 32  |

| Strain             | MIC (µg/mL) |        |      |     |     |     |     |     |
|--------------------|-------------|--------|------|-----|-----|-----|-----|-----|
|                    | CHL         | CIP    | TET  | IPM | ATM | AMK | RIF | MIN |
| EN-029             | 128         | 0.25   | 32   | 1   | 8   | 4   | 16  | 32  |
| EN-030             | 128         | 2      | 32   | 0.5 | 1   | 2   | 32  | 32  |
| EN-031             | 128         | 0.125  | 32   | 1   | 4   | 4   | 16  | 16  |
| EN-032             | 128         | 0.125  | 32   | 1   | 4   | 4   | 16  | 16  |
| EN-033             | 128         | 0.125  | 16   | 1   | 4   | 2   | 16  | 16  |
| EN-034             | 64          | 0.0625 | 16   | 1   | 2   | 4   | 8   | 8   |
| EN-035             | 128         | 0.25   | 32   | 2   | 4   | 4   | 32  | 32  |
| EN-036             | 128         | 0.0625 | 16   | 1   | 2   | 4   | 8   | 16  |
| EN-037             | 128         | 0.125  | 16   | 1   | 4   | 4   | 32  | 16  |
| EN-038             | 128         | 0.25   | 32   | 1   | 4   | 4   | 32  | 32  |
| EN-039             | 128         | 0.125  | 32   | 0.5 | 2   | 4   | 16  | 32  |
| EN-040             | 128         | 0.0625 | 16   | 1   | 2   | 4   | 8   | 16  |
| EN-041             | 128         | 0.0625 | 16   | 1   | 2   | 2   | 8   | 16  |
| EN-042             | 128         | 0.125  | 32   | 1   | 4   | 4   | 32  | 32  |
| EN-043             | 128         | 0.125  | 16   | 0.5 | 2   | 4   | 8   | 16  |
| EN-044             | 128         | 0.125  | 32   | 1   | 4   | 2   | 16  | 32  |
| EN-045             | 128         | 0.0625 | 16   | 1   | 4   | 4   | 16  | 16  |
| EN-046             | 128         | 0.0625 | 16   | 1   | 2   | 4   | 16  | 16  |
| EN-047             | 128         | 0.125  | 32   | 1   | 4   | 4   | 32  | 32  |
| EN-048             | 128         | 0.125  | 16   | 1   | 4   | 4   | 8   | 16  |
| EN-049             | 128         | 0.125  | 32   | 1   | 4   | 2   | 32  | 32  |
| EN-050             | 128         | 0.25   | 32   | 2   | 8   | 4   | 32  | 32  |
| 8380 <sup>a</sup>  | 128         | 0.125  | 32   | 1   | 4   | 8   | 16  | 32  |
| PAO1S <sup>b</sup> | 64          | 0.125  | >256 | 2   | 4   | 4   | 16  | 256 |

<sup>a</sup> The representative strain of *P. aeruginosa* isolated from the clinic.

<sup>b</sup> Standard strain of *P. aeruginosa*, which possess Tet<sup>r</sup> gene for marker in genome.

\*CHL, chloramphenicol; CIP, ciprofloxacin; TET, tetracycline; IPM, imipenem; ATM, aztreonam; AMK, amikacin; RIF, rifampicin; MIN, minocycline.

**Table S3.** The results of antibiotic susceptibility of the strains isolated from the clinical site.

| Strain | MIC ( $\mu\text{g/mL}$ ) |         |     |     |       |     |     |     |
|--------|--------------------------|---------|-----|-----|-------|-----|-----|-----|
|        | CHL                      | CIP     | TET | IPM | ATM   | AMK | RIF | MIN |
| CL01   | >1024                    | 4       | 64  | 32  | 16    | 2   | 32  | 128 |
| CL02   | 128                      | >32     | 32  | 32  | 8     | 4   | 16  | 32  |
| CL03   | 256                      | 0.125   | 32  | 1   | 4     | 2   | 16  | 32  |
| CL04   | 256                      | 0.125   | 32  | 2   | 4     | 4   | 32  | 32  |
| CL05   | 256                      | 0.25    | 32  | 4   | 8     | 8   | 16  | 64  |
| CL06   | 256                      | 0.125   | 64  | 2   | 4     | 4   | 32  | 64  |
| CL07   | 512                      | 1       | 128 | 2   | 16    | 2   | 32  | 256 |
| CL08   | 256                      | 0.125   | 32  | 32  | 8     | 8   | 16  | 32  |
| CL09   | 128                      | 0.125   | 32  | 1   | 8     | 2   | 16  | 32  |
| CL10   | 256                      | 0.25    | 32  | 1   | 4     | 4   | 32  | 32  |
| CL11   | 128                      | 0.25    | 32  | 1   | 4     | 4   | 32  | 32  |
| CL12   | 128                      | 0.125   | 32  | 16  | 16    | 1   | 16  | 16  |
| CL13   | 128                      | 0.125   | 16  | 1   | 8     | 1   | 32  | 8   |
| CL14   | 512                      | 0.25    | 32  | 1   | 32    | 2   | 32  | 64  |
| CL15   | 128                      | <0.0625 | 16  | 32  | 8     | 4   | 16  | 8   |
| CL16   | 256                      | 0.25    | 64  | 2   | 8     | 8   | 32  | 32  |
| CL17   | 256                      | 0.125   | 64  | 1   | 4     | 2   | 16  | 32  |
| CL18   | 64                       | 0.125   | 16  | 2   | <0.25 | 8   | 16  | 8   |
| CL19   | 256                      | 0.25    | 32  | 1   | 4     | 4   | 32  | 32  |
| CL20   | 256                      | 0.25    | 32  | 1   | 8     | 4   | 32  | 32  |
| CL21   | 256                      | 0.25    | 64  | 2   | 8     | 8   | 32  | 64  |
| CL22   | 128                      | 0.125   | 32  | 2   | 4     | 2   | 32  | 16  |
| CL23   | 64                       | 0.25    | 32  | 4   | 8     | 2   | 16  | 32  |
| CL24   | 256                      | 0.125   | 32  | 1   | 8     | 4   | 16  | 32  |
| CL25   | 256                      | 0.25    | 64  | 2   | 16    | 4   | 16  | 32  |
| CL26   | 512                      | 32      | 64  | 1   | 16    | 8   | 16  | 64  |
| CL27   | 256                      | 2       | 128 | 32  | >32   | 128 | 64  | 64  |
| CL28   | >1024                    | 2       | 32  | 8   | 2     | 1   | 32  | 128 |

| Strain             | MIC (µg/mL) |       |      |     |     |     |     |      |
|--------------------|-------------|-------|------|-----|-----|-----|-----|------|
|                    | CHL         | CIP   | TET  | IPM | ATM | AMK | RIF | MIN  |
| CL29               | 256         | 0.5   | 64   | 2   | 16  | 4   | 16  | 32   |
| CL30               | 128         | 0.25  | 32   | 2   | 4   | 2   | 32  | 32   |
| CL31               | 256         | 4     | 32   | 1   | 8   | 2   | 32  | 64   |
| CL32               | 128         | 0.25  | 32   | 1   | 4   | 4   | 32  | 32   |
| CL33               | 256         | 0.25  | 32   | 1   | 4   | 2   | 16  | 32   |
| CL34               | 256         | 0.25  | 32   | 1   | 8   | 2   | 16  | 32   |
| CL35               | 512         | 2     | 128  | 4   | >32 | 16  | 32  | >256 |
| CL36               | 256         | 0.25  | 32   | 1   | 4   | 4   | 32  | 32   |
| CL37               | 256         | >32   | 64   | 2   | 4   | 16  | 16  | 64   |
| CL38               | <8          | 4     | 32   | 16  | 8   | 32  | 8   | 16   |
| CL39               | 256         | 0.25  | 32   | 1   | 4   | 4   | 16  | 32   |
| CL40               | 512         | 8     | 64   | 32  | >32 | 8   | 16  | 128  |
| CL41               | <8          | 0.5   | <0.5 | 4   | 4   | 32  | 16  | <1   |
| CL42               | 128         | 0.25  | 64   | 2   | 4   | 8   | 16  | 64   |
| 8380 <sup>a</sup>  | 128         | 0.125 | 32   | 1   | 4   | 8   | 16  | 32   |
| PAO1S <sup>b</sup> | 64          | 0.125 | >256 | 2   | 4   | 4   | 16  | 256  |

<sup>a</sup> The representative strain of *P. aeruginosa* isolated from the clinic.

<sup>b</sup> Standard strain of *P. aeruginosa*, which possess Tet<sup>r</sup> gene for marker in genome.

\*CHL, chloramphenicol; CIP, ciprofloxacin; TET, tetracycline; IPM, imipenem; ATM, aztreonam; AMK, amikacin; RIF, rifampicin; MIN, minocycline.

**Table S4.** The POT values, tolerance to carbapenem, and mutation frequency of environmental strains.

| Strain | POT value |      | Tolerance                               | Mutation frequency |
|--------|-----------|------|-----------------------------------------|--------------------|
|        | POT1      | POT2 | (MBC <sup>AD</sup> /MIC <sup>AD</sup> ) |                    |
| EN-001 | 88        | 0    | >128                                    | 1.73E-08           |
| EN-002 | 634       | 0    | >128                                    | 2.17E-08           |
| EN-003 | 136       | 0    | >128                                    | 1.10E-08           |
| EN-004 | 88        | 0    | 128                                     | 4.05E-08           |
| EN-005 | 30        | 0    | 64                                      | 2.83E-08           |
| EN-006 | 365       | 0    | >128                                    | 1.35E-08           |
| EN-007 | 88        | 0    | 128                                     | 1.64E-08           |
| EN-008 | 94        | 0    | 64                                      | 1.47E-08           |
| EN-009 | 94        | 0    | 64                                      | 1.25E-08           |
| EN-010 | 886       | 4    | >128                                    | 6.40E-08           |
| EN-011 | 415       | 16   | 16                                      | 6.46E-06           |
| EN-012 | 378       | 16   | 128                                     | 5.56E-08           |
| EN-013 | 656       | 34   | 32                                      | 6.08E-08           |
| EN-014 | 830       | 0    | 128                                     | 1.45E-08           |
| EN-015 | 40        | 16   | 128                                     | 2.51E-08           |
| EN-016 | 382       | 0    | >128                                    | 4.98E-08           |
| EN-017 | 886       | 4    | 128                                     | 2.88E-08           |
| EN-018 | 886       | 4    | >128                                    | 2.35E-07           |
| EN-019 | 30        | 0    | 32                                      | 5.69E-08           |
| EN-020 | 30        | 0    | 128                                     | 1.13E-08           |
| EN-021 | 886       | 4    | 128                                     | 4.44E-08           |
| EN-022 | 892       | 0    | 128                                     | 1.09E-08           |
| EN-023 | 378       | 48   | 128                                     | 4.38E-08           |
| EN-024 | 56        | 16   | >128                                    | 2.51E-08           |
| EN-025 | 362       | 48   | >128                                    | 9.94E-08           |
| EN-026 | 634       | 0    | 128                                     | 2.63E-08           |
| EN-027 | 634       | 0    | 128                                     | 1.71E-08           |



| Strain             | POT value |      | Tolerance<br>(MBC <sup>AD</sup> /MIC <sup>AD</sup> ) | Mutation frequency |
|--------------------|-----------|------|------------------------------------------------------|--------------------|
|                    | POT1      | POT2 |                                                      |                    |
| EN-028             | 830       | 16   | >128                                                 | 1.87E-08           |
| EN-029             | 659       | 4    | 128                                                  | 5.95E-09           |
| EN-030             | 222       | 0    | 128                                                  | 1.11E-08           |
| EN-031             | 206       | 0    | 64                                                   | 8.69E-09           |
| EN-032             | 206       | 0    | 128                                                  | 1.10E-08           |
| EN-033             | 556       | 0    | 128                                                  | 9.01E-09           |
| EN-034             | 206       | 0    | 64                                                   | 8.11E-08           |
| EN-035             | 44        | 0    | 64                                                   | 4.73E-08           |
| EN-036             | 206       | 0    | 128                                                  | 3.09E-08           |
| EN-037             | 572       | 16   | 8                                                    | 2.74E-08           |
| EN-038             | 637       | 0    | 128                                                  | 1.90E-08           |
| EN-039             | 637       | 0    | 32                                                   | 3.47E-08           |
| EN-040             | 206       | 0    | 128                                                  | 1.07E-08           |
| EN-041             | 205       | 0    | 4                                                    | 1.60E-08           |
| EN-042             | 633       | 0    | 128                                                  | 1.91E-08           |
| EN-043             | 44        | 0    | 16                                                   | 9.79E-09           |
| EN-044             | 44        | 0    | 256                                                  | 8.10E-08           |
| EN-045             | 205       | 0    | 16                                                   | 8.07E-09           |
| EN-046             | 205       | 0    | 128                                                  | 3.99E-09           |
| EN-047             | 637       | 0    | 128                                                  | 2.10E-08           |
| EN-048             | 205       | 0    | 32                                                   | 5.50E-09           |
| EN-049             | 44        | 0    | 128                                                  | 8.27E-09           |
| EN-050             | 44        | 0    | 32                                                   | 4.27E-08           |
| 8380 <sup>a</sup>  | 310       | 16   | -                                                    | -                  |
| PAO1S <sup>b</sup> | 382       | 0    | 32                                                   | 2.75E-08           |

<sup>a</sup> The representative strain of *P. aeruginosa* isolated from the clinic.

<sup>b</sup> Standard strain of *P. aeruginosa*, which possess Tet<sup>r</sup> gene for marker in genome.

**Table S5.** The POT values, tolerance to carbapenem, and mutation frequency of clinical strains.

| Strain | POT value |      | Tolerance<br>(MBC <sup>AD</sup> /MIC <sup>AD</sup> ) | Mutation<br>frequency |
|--------|-----------|------|------------------------------------------------------|-----------------------|
|        | POT1      | POT2 |                                                      |                       |
| CL01   | 974       | 18   | -                                                    | 3.49E-07              |
| CL02   | 672       | 0    | -                                                    | 1.32E-08              |
| CL03   | 656       | 50   | 4                                                    | 1.53E-08              |
| CL04   | 61        | 48   | 64                                                   | 5.20E-08              |
| CL05   | 636       | 0    | 64                                                   | 3.13E-08              |
| CL06   | 383       | 16   | 64                                                   | 6.33E-09              |
| CL07   | 10        | 0    | 4                                                    | 1.96E-08              |
| CL08   | 823       | 16   | -                                                    | 1.08E-08              |
| CL09   | 643       | 0    | 128                                                  | 3.04E-08              |
| CL10   | 44        | 0    | 64                                                   | 3.49E-08              |
| CL11   | 706       | 0    | 128                                                  | 2.64E-08              |
| CL12   | 383       | 36   | -                                                    | 1.68E-08              |
| CL13   | 706       | 16   | 128                                                  | 1.57E-08              |
| CL14   | 604       | 50   | 64                                                   | 1.18E-08              |
| CL15   | 634       | 0    | -                                                    | 6.92E-09              |
| CL16   | 634       | 0    | 128                                                  | 9.46E-09              |
| CL17   | 367       | 0    | >128                                                 | 9.84E-08              |
| CL18   | 887       | 16   | 16                                                   | 1.42E-08              |
| CL19   | 122       | 0    | 64                                                   | 4.36E-08              |
| CL20   | 71        | 0    | 128                                                  | 2.15E-08              |
| CL21   | 823       | 0    | 32                                                   | 8.37E-09              |
| CL22   | 623       | 0    | 128                                                  | 1.60E-08              |
| CL23   | 974       | 16   | 8                                                    | 1.83E-08              |
| CL24   | 392       | 48   | 32                                                   | 2.01E-08              |
| CL25   | 392       | 16   | 16                                                   | 1.49E-08              |
| CL26   | 199       | 16   | 64                                                   | 1.59E-08              |
| CL27   | 287       | 2    | -                                                    | 3.77E-08              |

| Strain             | POT value |      | Tolerance<br>(MBC <sup>AD</sup> /MIC <sup>AD</sup> ) | Mutation<br>frequency |
|--------------------|-----------|------|------------------------------------------------------|-----------------------|
|                    | POT1      | POT2 |                                                      |                       |
| CL28               | 382       | 48   | -                                                    | 1.62E-08              |
| CL29               | 392       | 16   | 64                                                   | 1.52E-07              |
| CL30               | 622       | 22   | 128                                                  | 1.42E-08              |
| CL31               | 636       | 52   | 64                                                   | 1.62E-08              |
| CL32               | 554       | 0    | 128                                                  | 3.03E-08              |
| CL33               | 360       | 0    | 64                                                   | 6.19E-09              |
| CL34               | 360       | 0    | 64                                                   | 1.77E-08              |
| CL35               | 823       | 0    | 64                                                   | 1.79E-08              |
| CL36               | 62        | 0    | 64                                                   | 3.38E-08              |
| CL37               | 307       | 0    | 4                                                    | 5.14E-08              |
| CL38               | 575       | 0    | -                                                    | 3.83E-06              |
| CL39               | 108       | 0    | >128                                                 | 2.52E-08              |
| CL40               | 383       | 36   | -                                                    | 5.45E-09              |
| CL41               | 282       | 0    | 2                                                    | 8.86E-06              |
| CL42               | 125       | 0    | 32                                                   | 1.72E-08              |
| 8380 <sup>a</sup>  | 310       | 16   | -                                                    | -                     |
| PAO1S <sup>b</sup> | 382       | 0    | 32                                                   | 2.75E-08              |

<sup>a</sup> The representative strain of *P. aeruginosa* isolated from the clinic.

<sup>b</sup> Standard strain of *P. aeruginosa*, which possess Tet<sup>r</sup> gene for marker in genome.

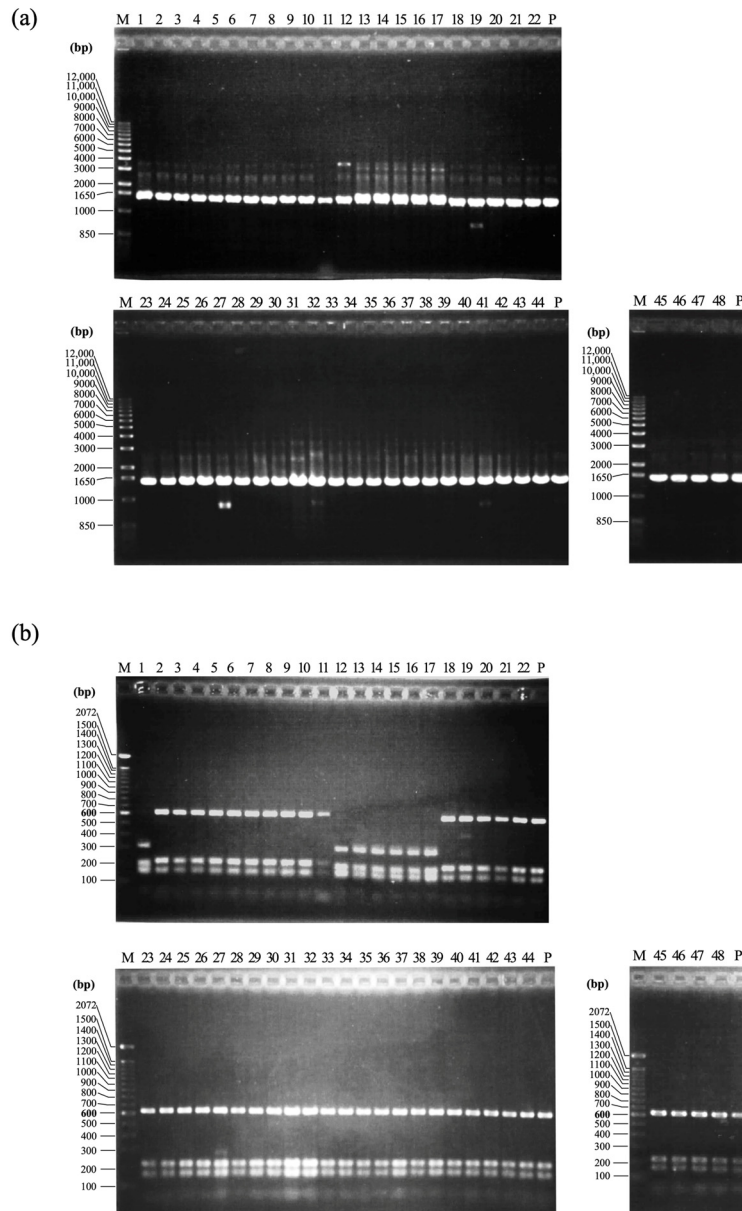

**Figure S1.** Electrophoresis diagram of DNA fragment amplified and restriction fragment length polymorphism analysis of 16S rDNA. (a) PCR analysis employing the primer BSF 8/20 and BSR1541/20 pairs on 16S rDNA. Lane M: 1 kb ladder; lane P: *P. aeruginosa* PAO1S; lanes 1 to 48: strains #1 to #48. (b) Restriction fragment length polymorphism analysis. Lane M: 100 bp ladder; lane P: *P. aeruginosa* PAO1S; lanes 1 to 48: strains #1 to #48.

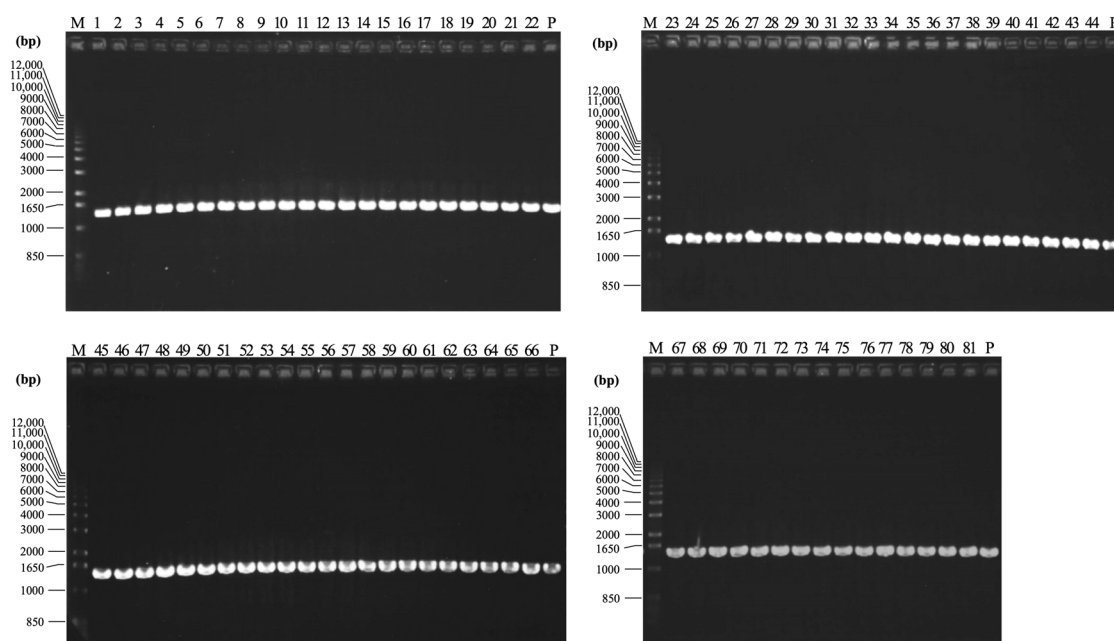

**Figure S2.** Electrophoresis diagram of DNA fragment amplified with primer set, 16S PAF 139/21 and BSR 1541/20, with genomic DNA of isolated bacteria from the environment. Lane M: 1kb ladder; lane P: *P. aeruginosa* PAO1S; lanes 1 to 81: strains isolated from river water, #1 to #81.

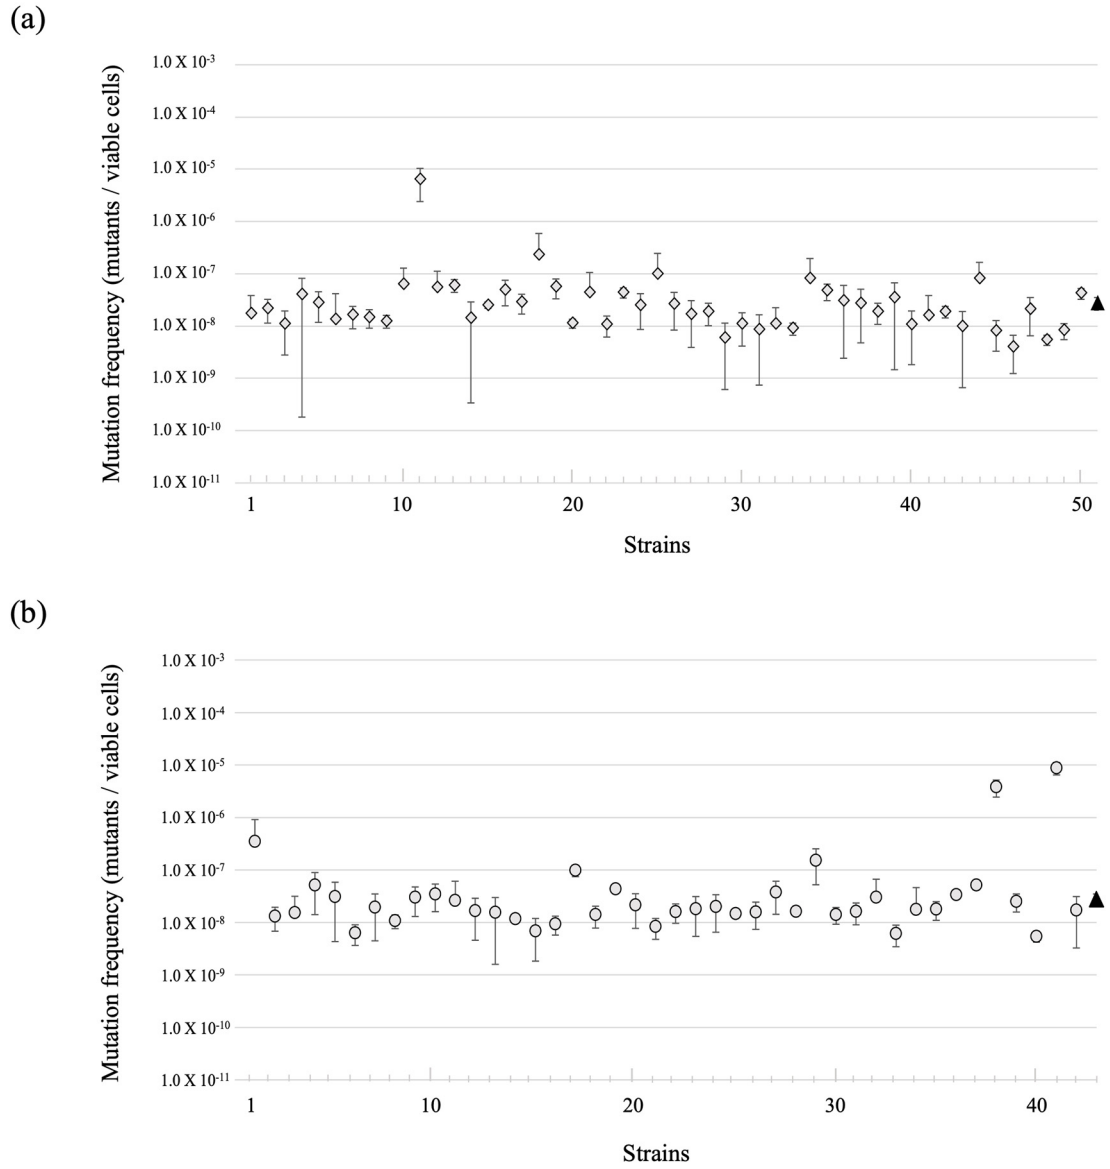

**Figure S3.** The mutation frequency ratio following exposure to rifampicin. (a)  $\diamond$  : the strains isolated from the environment, EN-001-050, Table S4. (b)  $\circ$  : the strains isolated from clinical settings, CL01-42, Table S5.  $\blacktriangle$  : PAO1S, which is the standard strain of *P. aeruginosa*.
